# Supplementary material for: Microbial communities of the house fly Musca domestica vary with geographical location and habitat
Source: PubMed Central journal article supplement (PMC6839111; doi:10.1186/s40168-019-0748-9), 2019-11-08

Figure S1

A

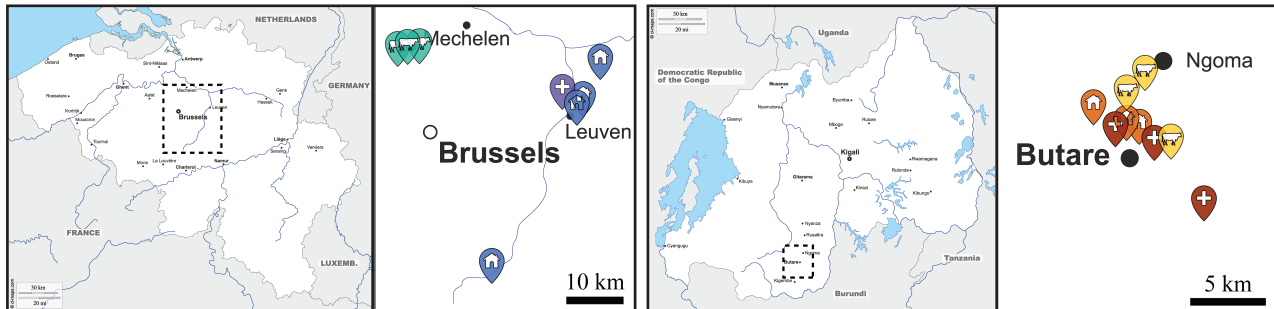

B

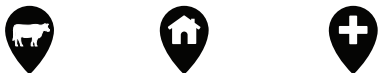

|                | Farms                                                                | Homes                                                                                    | Hospitals                                                            |
|----------------|----------------------------------------------------------------------|------------------------------------------------------------------------------------------|----------------------------------------------------------------------|
| <b>Belgium</b> | 50.991972, 4.282715<br>50.991715, 4.279653<br>50.990618, 4.289008    | 50.866309, 4.710887<br>50.880713, 4.718678<br>50.785502, 4.588548<br>50.986216, 4.836012 | 50.878240, 4.672927                                                  |
| <b>Rwanda</b>  | -2.586192, 29.752107<br>-2.605701, 29.753504<br>-2.562347, 29.761564 | -2.603652, 29.742447<br>-2.593389, 29.740028<br>-2.602376, 29.742477                     | -2.607050, 29.747836<br>-2.648569, 29.783236<br>-2.604755, 29.741463 |

C

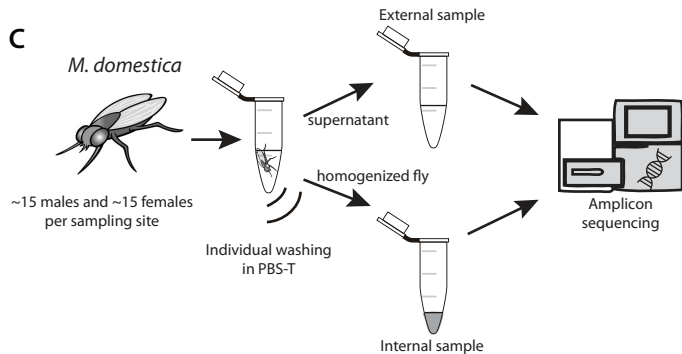

Figure S2

A

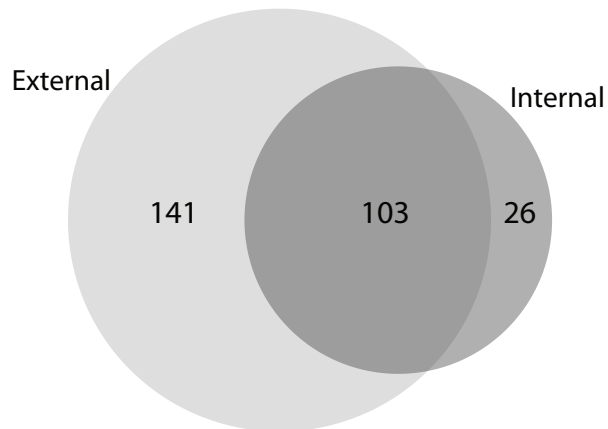

B

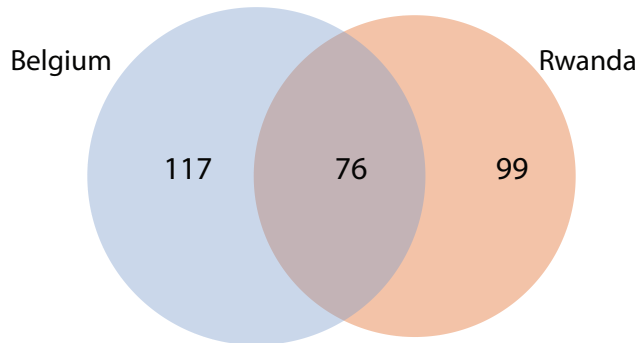

C

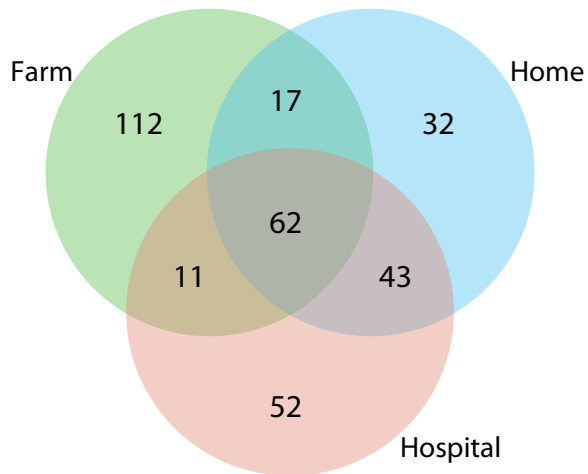

D

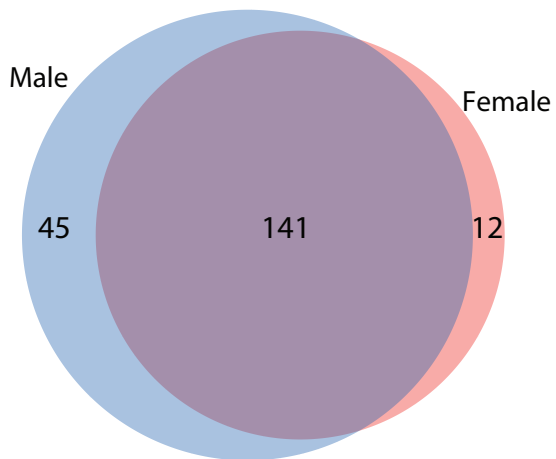

Figure S3

A

Internal bacteria

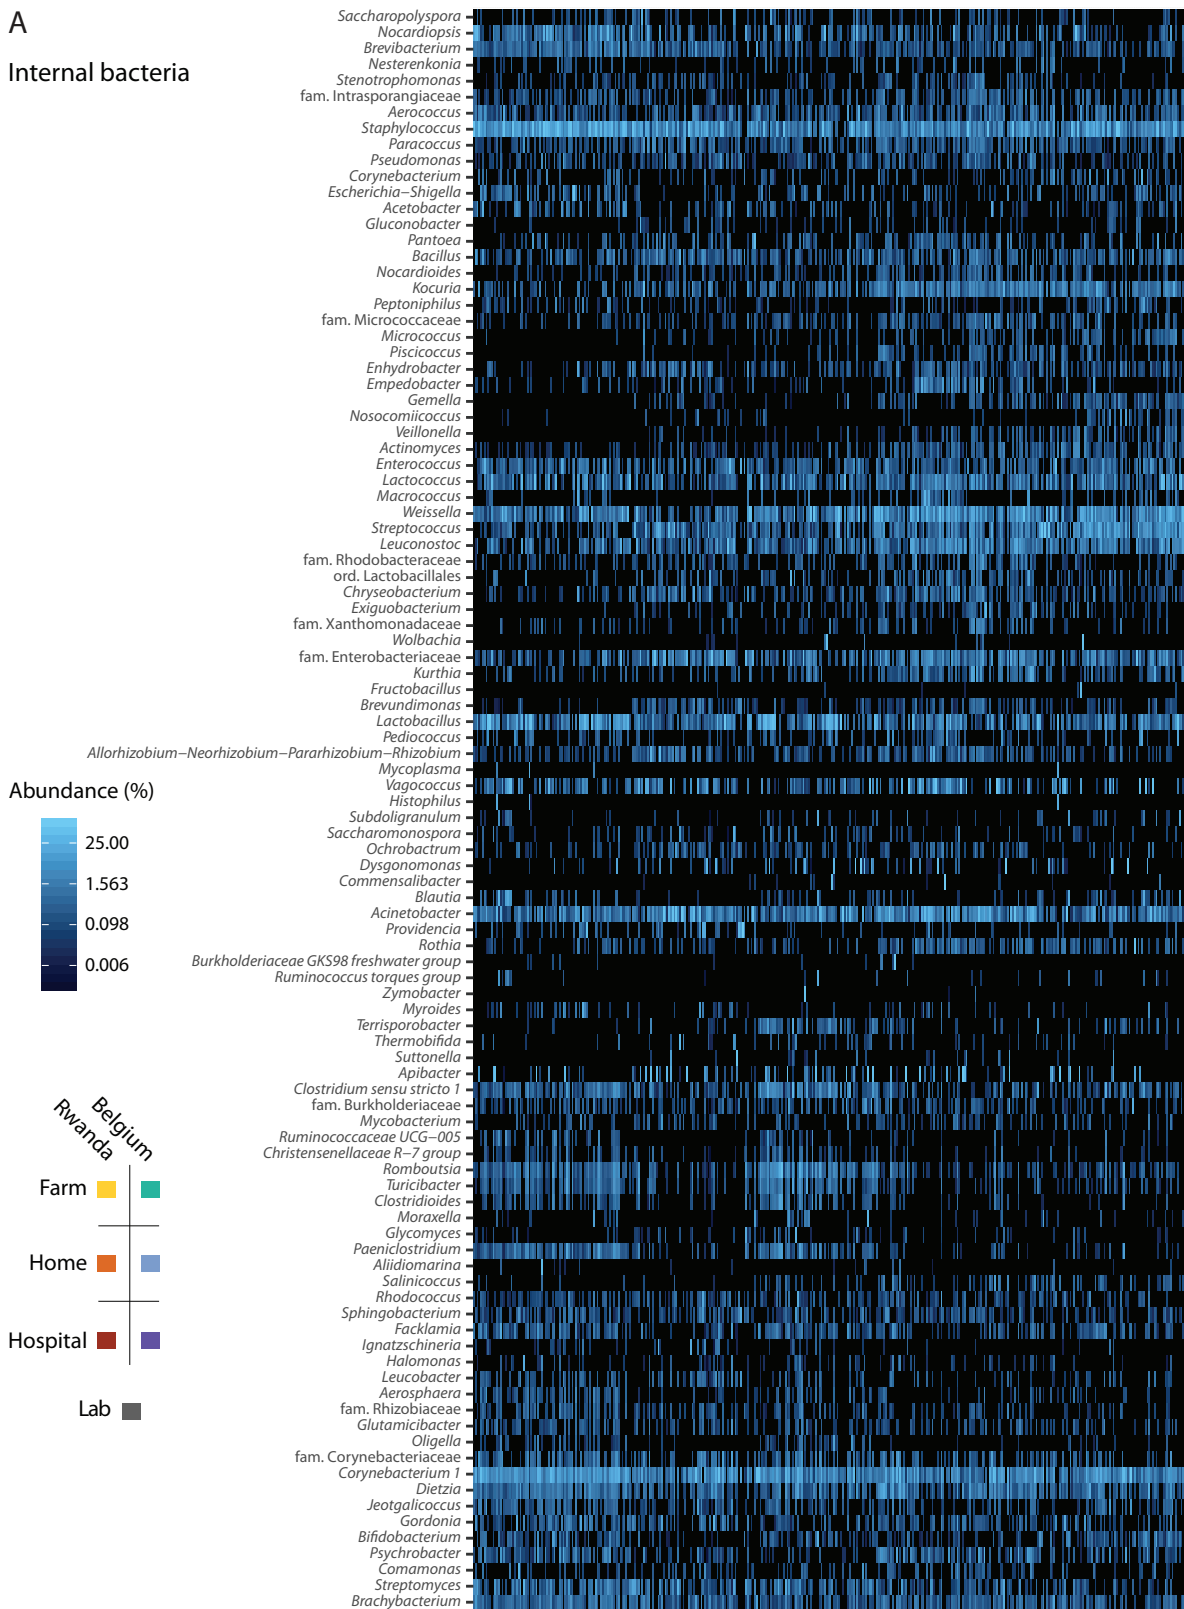

B

External bacteria

Abundance (%)

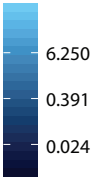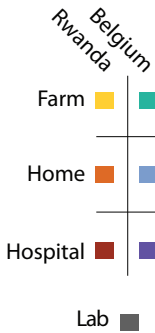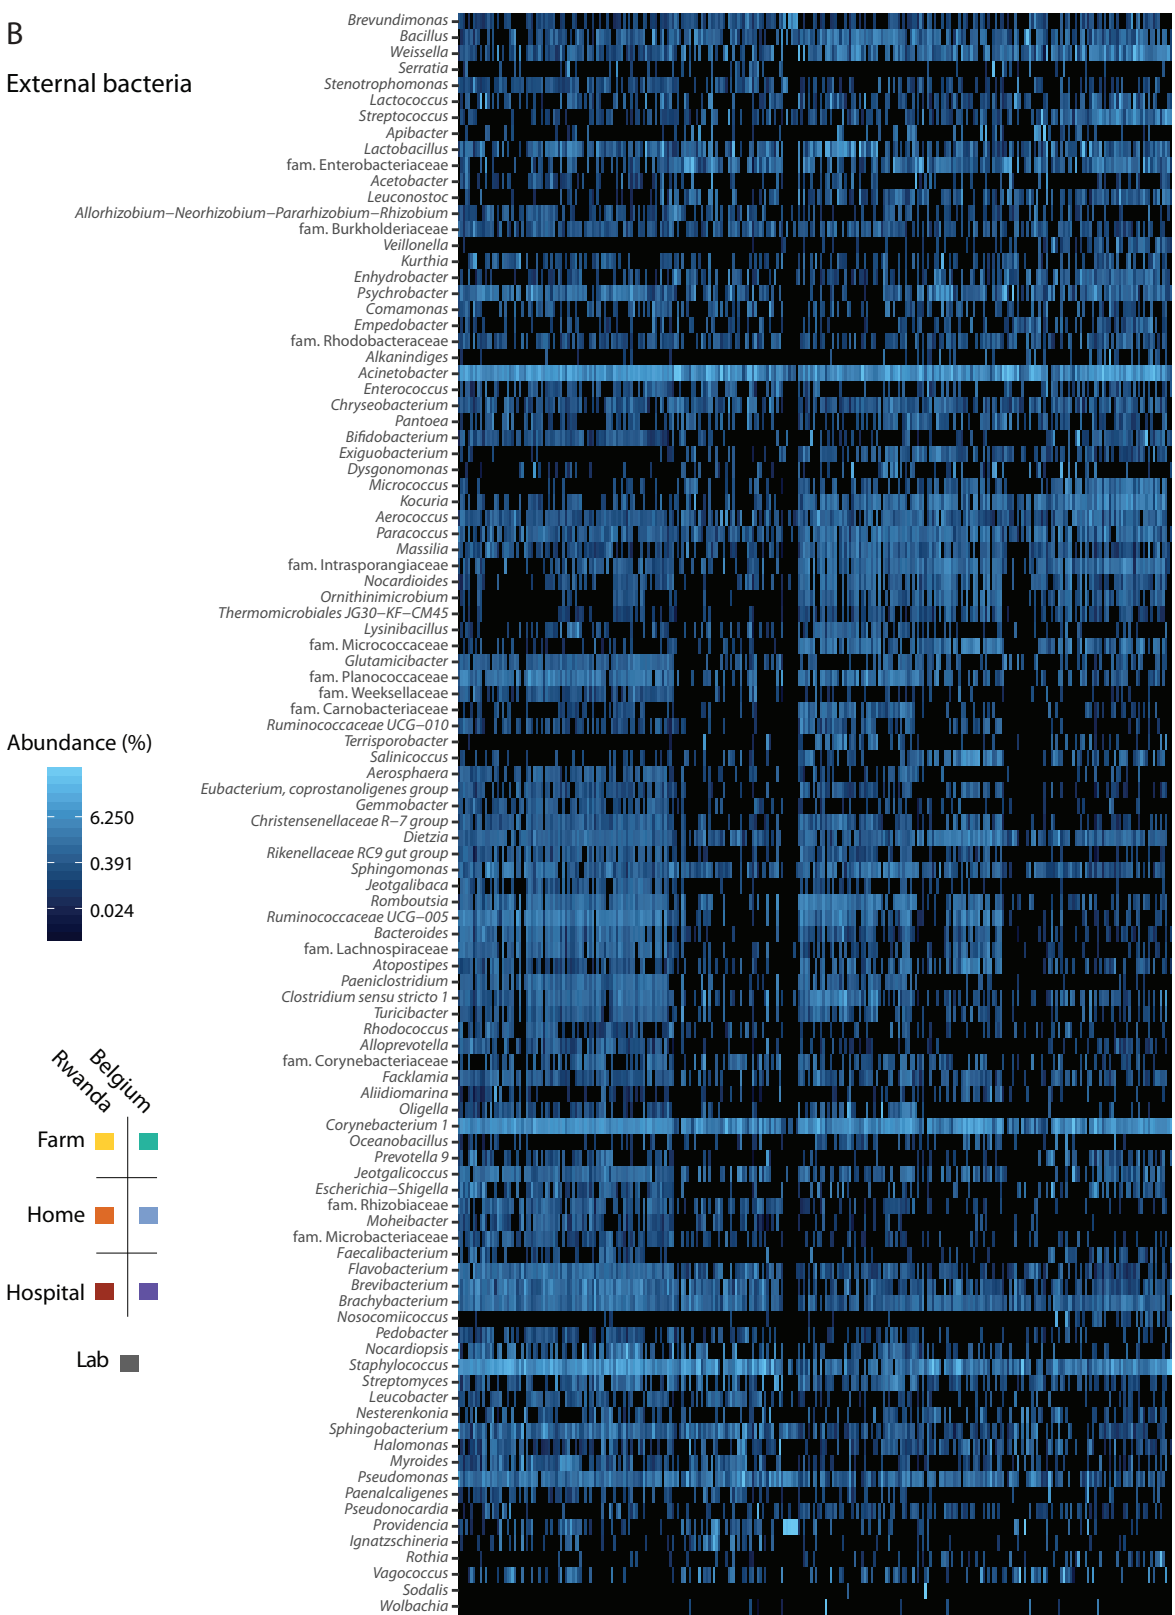

C

## Internal fungi

Abundance (%)

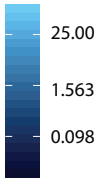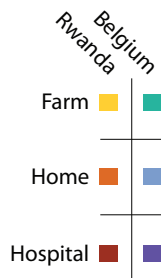

fam. Saccharomycetales\_fam\_Incertae\_sedis  
*Quambalaria*  
*Didymella*  
*Dichotomopilus*  
*Millerozyma*  
 ord. Eurotiales  
 fam. Ustilaginaceae  
*Acremonium*  
*Torulaspora*  
*Cyberlindnera*  
*Fusarium*  
*Cephalotrichum*  
*Thermomyces*  
 ord. Hypocreales  
*Acrostalagmus*  
*Trichoderma*  
*Dekkera*  
 ord. Saccharomycetales  
*Gibellulopsis*  
*Rhizopus*  
*Yamadazyma*  
*Penicillium*  
*Ophiostoma*  
*Yarrowia*  
*Aspergillus*  
*Verrucocladosporium*  
*Lodderomyces*  
*Neurospora*  
*Rhodotorula*  
 Saccharomycetales  
*Cystobasidium*  
 Chaetomiaceae  
*Claviceps*  
*Candida*  
*Wickerhamomyces*  
*Cytospora*  
 fam. Pseudoeurotiaceae  
*Clavispora*  
*Hyphopichia*  
 fam. Mucoraceae  
*Microascus*  
*Talaromyces*  
*Pyrenochaetopsis*  
*Sporobolomyces*  
 fam. Microascaceae  
*Kazachstania*  
*Chrysosporium*  
*Cryptococcus*  
*Mucor*  
*Pyrenochaeta*  
*Scopulariopsis*  
 fam. Plectosphaerellaceae  
*Debaryomyces*  
*Diutina*  
*Vishniacozyma*  
*Kluyveromyces*  
 cla. Sordariomycetes  
*Wallemia*  
 fam. Microascaceae  
*Zymoseptoria*  
*Trichosporon*  
*Hydrophisphaera*  
 ord. Microascales  
*Podospora*  
 kin. Fungi  
*Blastobotrys*  
*Lecanicillium*  
*Sterigmatomyces*  
 phy. Ascomycota  
*Pithoascus*  
*Sarcocladium*  
*Ascosphaera*  
 ord. Capnodiales  
*Microdochium*  
*Alternaria*  
*Apiotrichum*  
 ord. Pleosporales  
*Podosphaera*  
*Arthrinium*  
 fam. Nectriaceae  
 ord. Hypocreales  
*Diaporthe*  
 fam. Didymellaceae  
*Leptosphaeria*  
*Hannaella*  
*Curvularia*  
*Arthrographis*  
*Periconia*  
*Cladosporium*  
*Gibberella*  
*Cercospora*  
*Paraconiothyrium*  
*Paraphaeosphaeria*  
*Saccharomyces*  
 ord. Pleosporales  
*Bipolaris*  
*Priceomyces*  
*Anthracoystis*  
*Schwanniomyces*  
*Absidia*

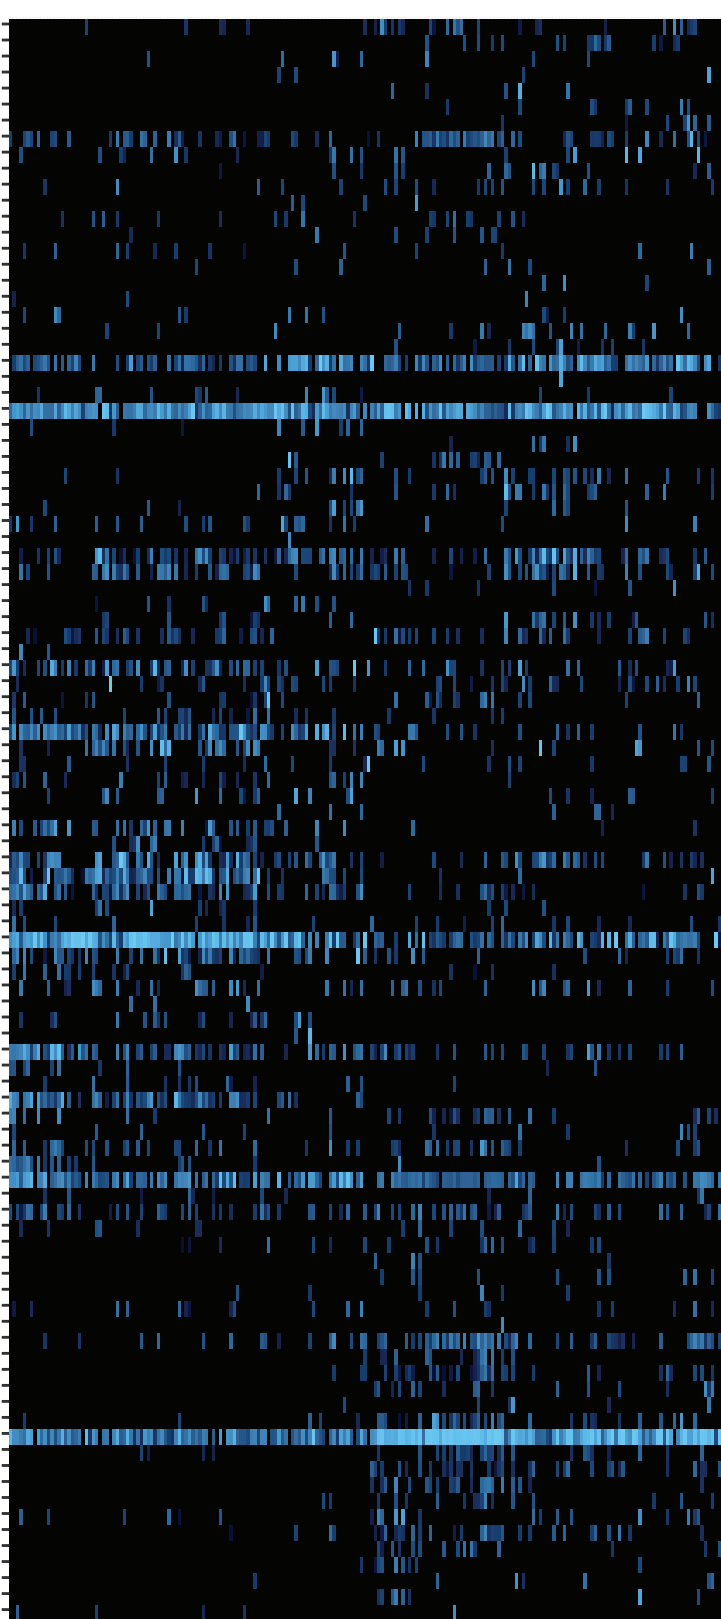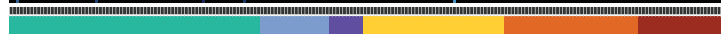

D

## External fungi

Abundance (%)

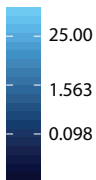Belgium  
Rwanda

Farm

Home

Hospital

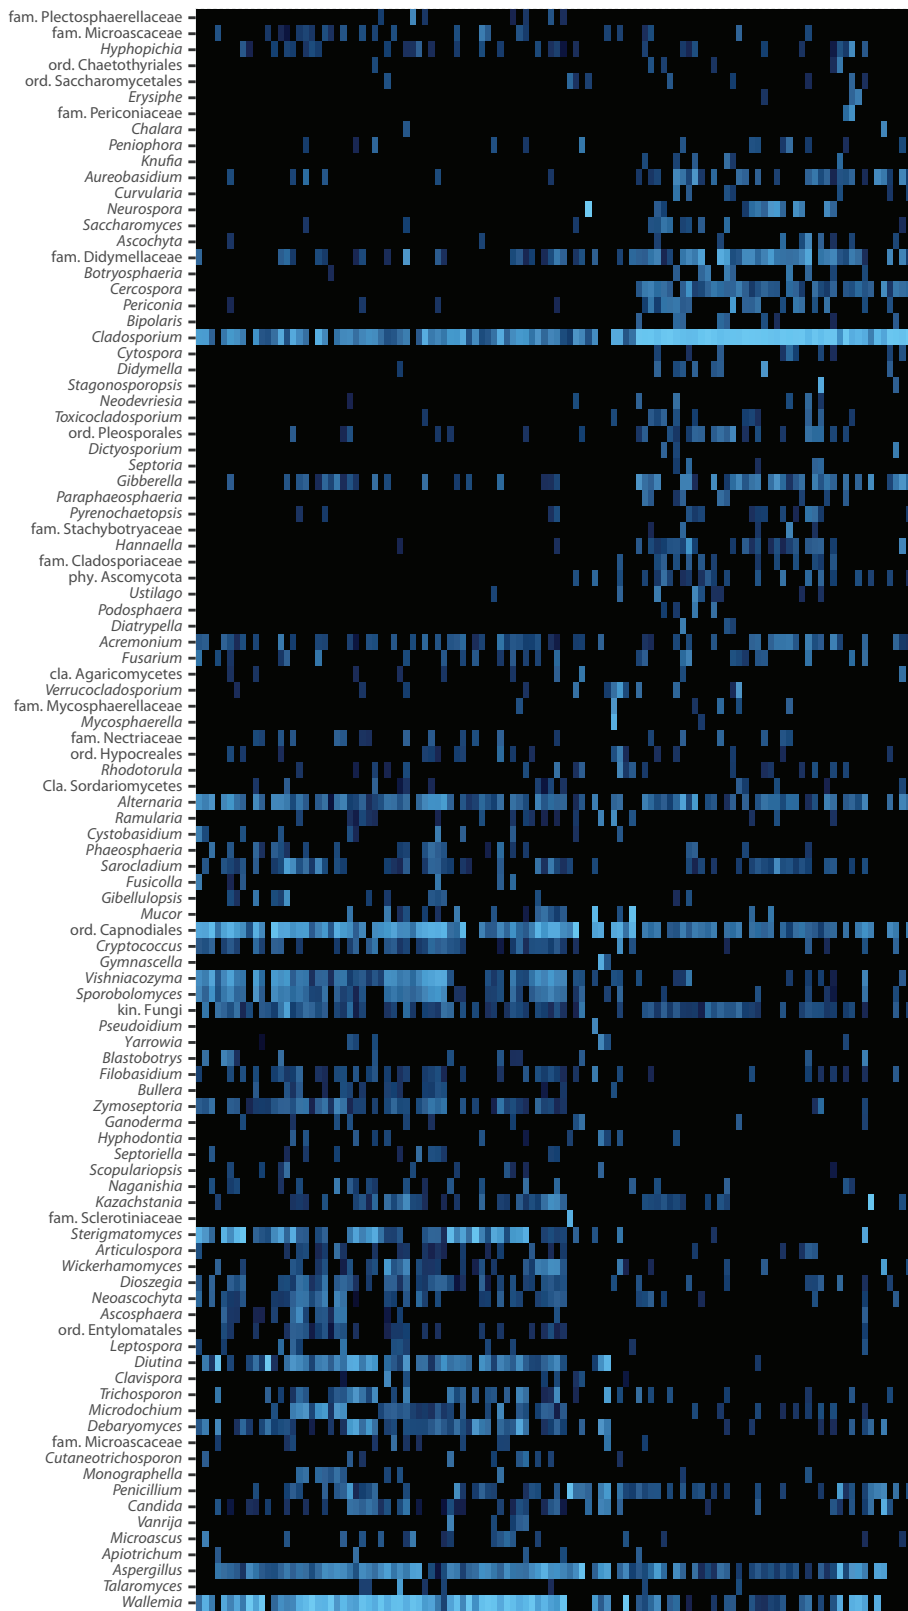

Figure S4

A

Bacteria

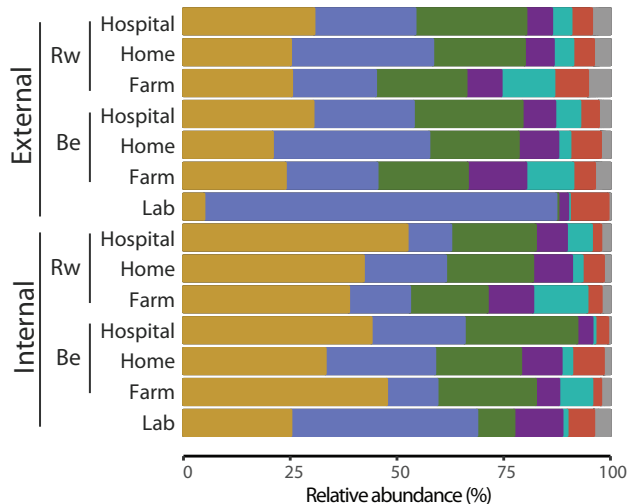

B

Fungi

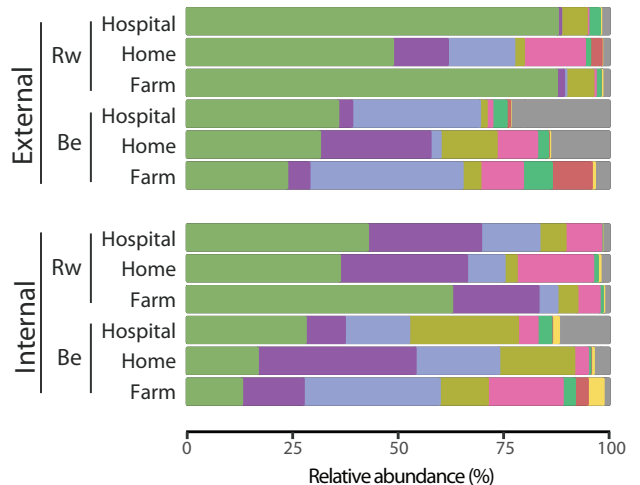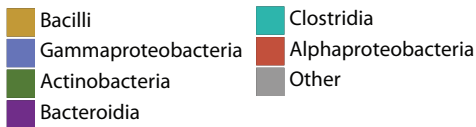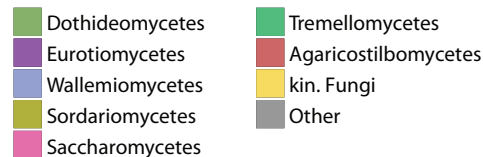

Figure S5

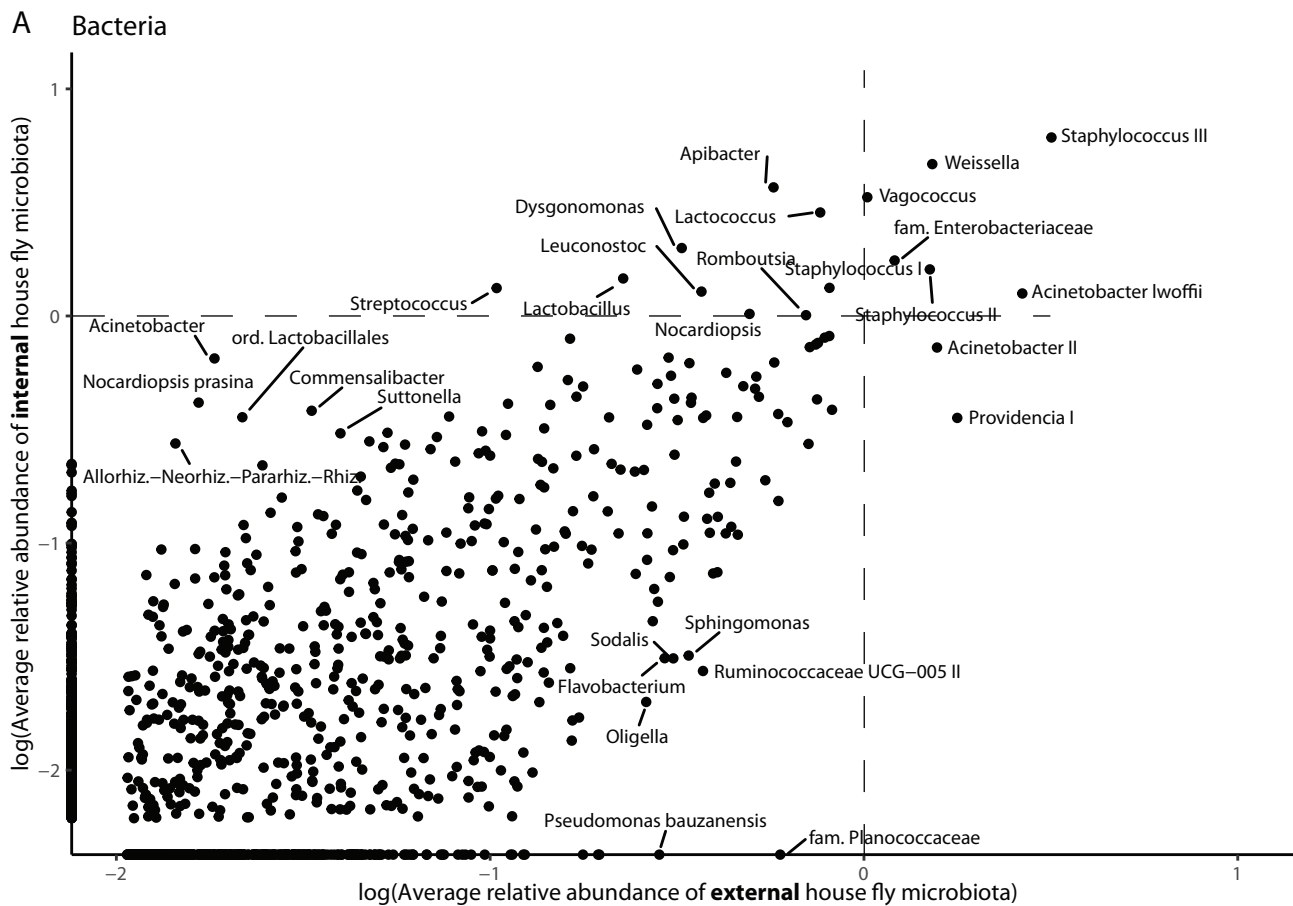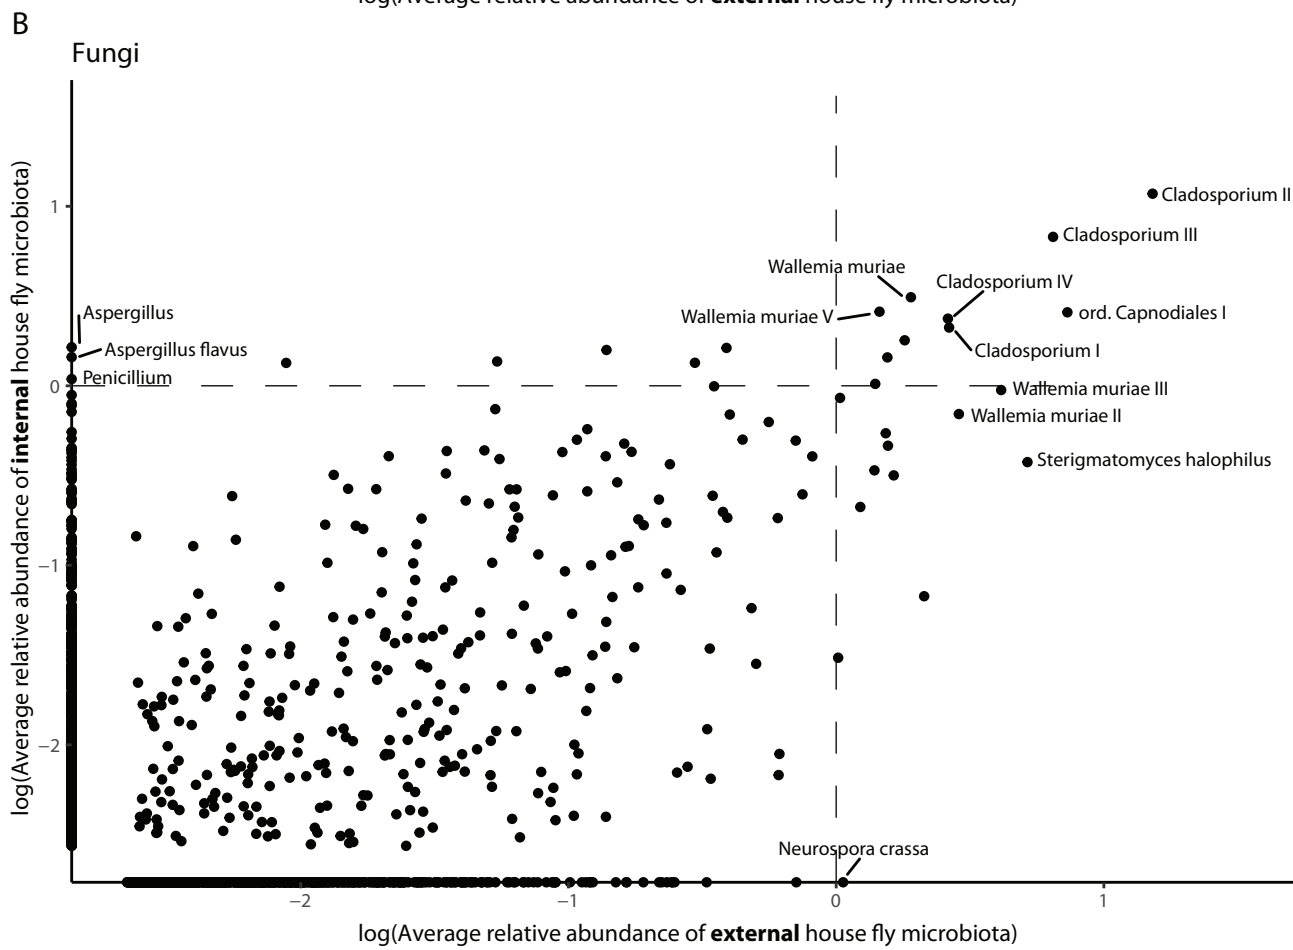



# Figure S6

## A

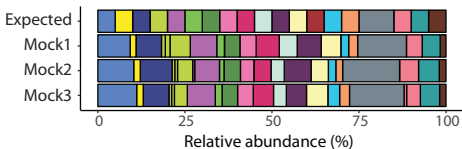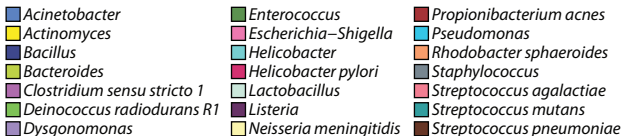

## B

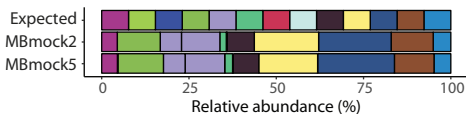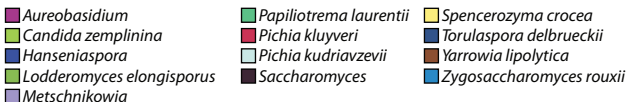

Supplement: 40168_2019_748_MOESM1_ESM.pdf [file 40168_2019_748_MOESM1_ESM.pdf]
